# Supplementary material for: Colistin resistance mutations in phoQ can sensitize Klebsiella pneumoniae to IgM-mediated complement killing
Source: PubMed Central journal article supplement (PMC10400624; doi:10.1038/s41598-023-39613-5), 2023-08-03
Supplement: 41598_2023_39613_MOESM1_ESM.pdf [file 41598_2023_39613_MOESM1_ESM.pdf]

## Supplementary information

### Colistin resistance mutations in *phoQ* can sensitize *Klebsiella pneumoniae* to IgM-mediated complement killing

Sjors P.A. van der Lans<sup>1</sup>, Manon Janet-Maitre<sup>2,3</sup>, Frerich M. Masson<sup>1</sup>, Kimberly A. Walker<sup>4</sup>, Dennis J. Doorduyn<sup>1</sup>, Axel B. Janssen<sup>1,5</sup>, Willem van Schaik<sup>1,6</sup>, Ina Attrée<sup>2</sup>, Suzan H. M. Rooijackers<sup>1</sup> and Bart W. Bardoel<sup>1\*</sup>

<sup>1</sup>Department of Medical Microbiology, University Medical Center Utrecht, Utrecht University, The Netherlands.

<sup>2</sup>Bacterial Pathogenesis and Cellular Responses group, UMR5075, Institute of Structural Biology, University Grenoble Alpes, France.

<sup>3</sup>Department of Molecular Microbiology, Washington University School of Medicine, St. Louis, Missouri, USA

<sup>4</sup>Department of Microbiology and Immunology, University of North Carolina, USA.

<sup>5</sup>Department of Fundamental Microbiology, University of Lausanne, Switzerland.

<sup>6</sup>Institute of Microbiology and Infection, College of Medical and Dental Sciences, University of Birmingham, United Kingdom.

\*Corresponding author: [B.W.Bardoel-2@umcutrecht.nl](mailto:B.W.Bardoel-2@umcutrecht.nl)

## Supplementary figure S11

Inner membrane permeabilization of Kp444, Kp879, Kp307, Kp365, Kp982, Kp709 and Kp880 in time. Bacteria were incubated in the presence of 10% NHS, 10% NHS in which C5 conversion was inhibited by addition of 20  $\mu\text{g}/\text{ml}$  OMCI and 20  $\mu\text{g}/\text{ml}$  Eculizumab (C5 inhibition), or 10% heat inactivated NHS (HiNHS), at 37  $^{\circ}\text{C}$  in the presence of 1  $\mu\text{M}$  SYTOX green nucleic acid stain, and inner membrane permeabilization (SYTOX fluorescence intensity) was detected every 2 minutes for 90 minutes in a microplate reader. Data represent mean  $\pm$  standard deviation of three independent experiments.

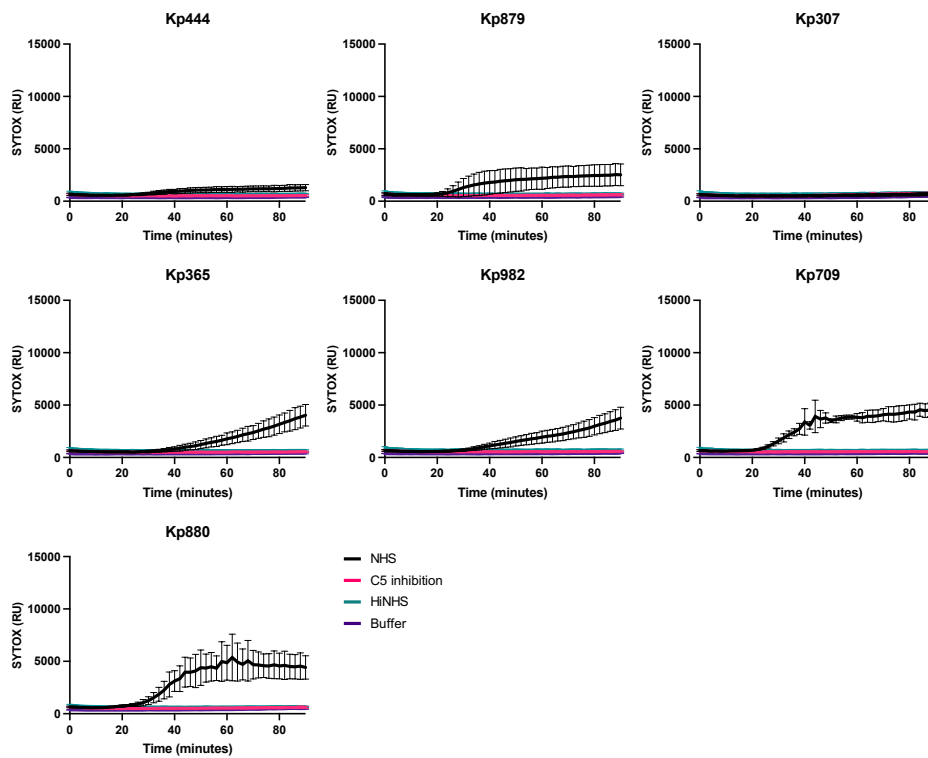

## Supplementary figure S12

(a) Inner membrane permeabilization of Kp209 and Kp209\_CSTR in the presences of (a) 10% NHS composed of sera from different pools of donors, or (b) 10% serum from different individual donors. (a&b) Bacteria were incubated at 37 °C in the presence of 1  $\mu$ M SYTOX green nucleic acid stain, and inner membrane permeabilization (SYTOX fluorescence intensity) was detected every 2 minutes for 90 minutes in a microplate reader. Data represent mean  $\pm$  standard deviation of three independent experiments.

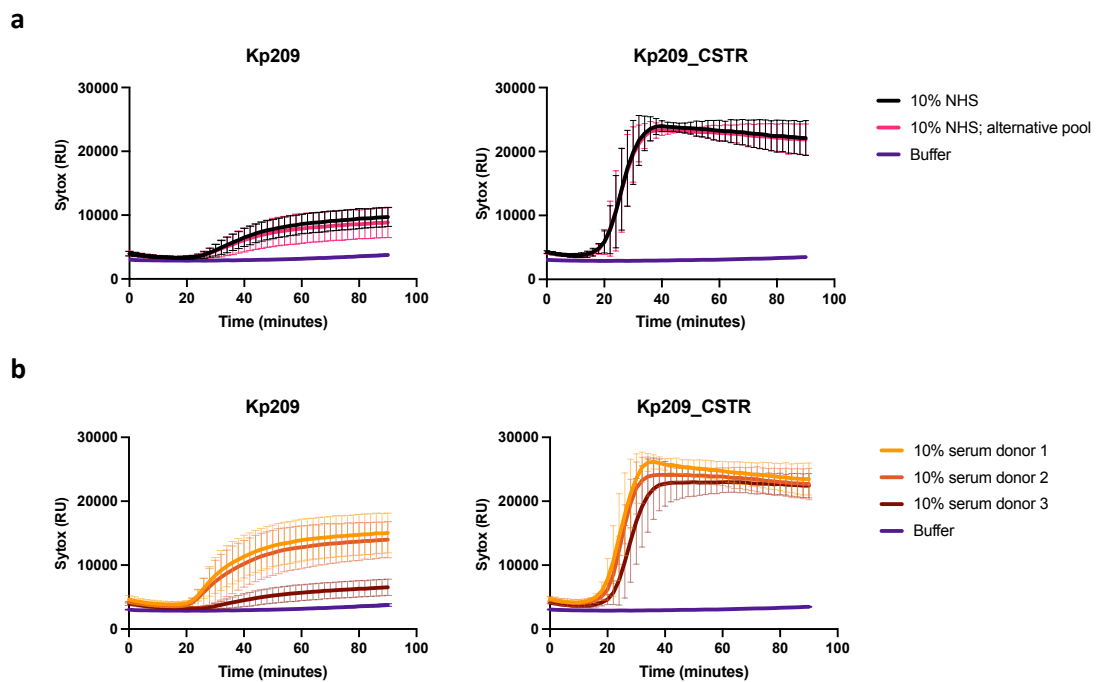

### Supplementary figure S13

RNA was isolated from log phase Kp257 and Kp257\_CSTR, and converted to cDNA. The relative expression of the *arnD* and *mgtE* genes compared to the *rpoB* control gene was determined by real-time PCR for both Kp257 and Kp257\_CSTR. Real-time PCR was performed in triplicates. Data represent mean  $\pm$  standard deviation of at least two independent biological replicates.

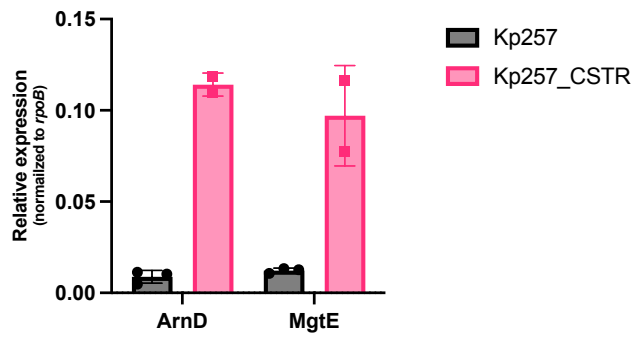

## Supplementary figure S14

(a) Capsule production of Kp209 and Kp209\_CSTR, and the Kp209\_CSTR Tn::*phoQ* mutants was determined by measuring uronic acid content. Absorbance was measured at 520 nm, the uronic acid content calculated using a glucuronolactone standard curve and normalized to the culture density at 600 nm. Data represent mean  $\pm$  standard deviation of three independent experiments. (F) Statistical analysis was performed using a paired one-way ANOVA with a Tukey's multiple comparisons test. Significance is shown as \*\*\*\* $p \leq 0.0005$ . (b) SDS-PAGE silver stain of Kp209 and Kp209\_CSTR LPS. Bacterial lysates were digested with protein K to remove all proteins and loaded on an SDS-PAGE gel. The LPS lipid A could, based on size, be distinguished from the O-antigen, which can have various lengths. Image is a representative of two independent experiments. Image is a representative of two independent experiments. Original gel is presented in supplementary Figure S2c. (c) Original gel of the SDS-PAGE silver stain containing of Kp209 and Kp209\_CSTR LPS, indicated with dashed lines.

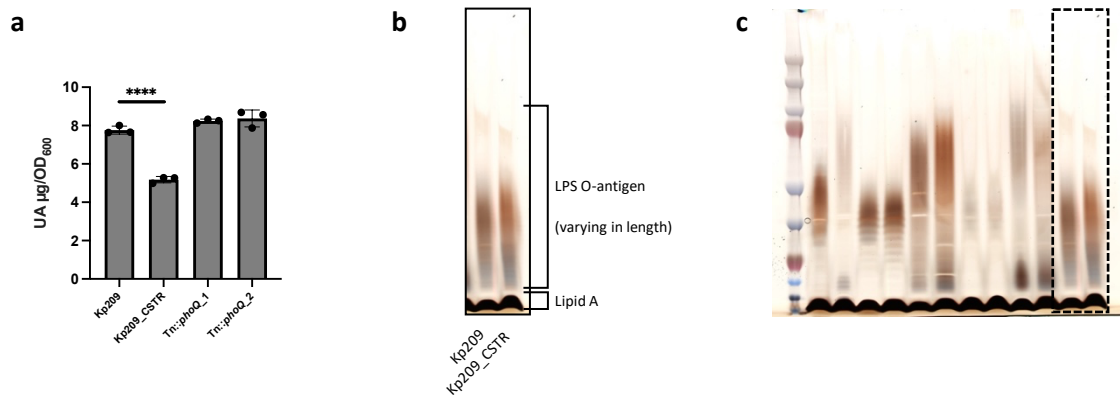

## Supplementary figure S15

(a&b) Total IgG (a) and IgM (b) binding to Kp209 and Kp209\_CSTR in normal human serum (NHS). (c&d) IgG and IgM binding to Kp209 (c) and *E. coli* MG1655 (d) in NHS depleted using *E. coli* MG1655, Kp209 or Kp209\_CSTR ( $\Delta E. coli$  NHS,  $\Delta Kp209$  NHS, and  $\Delta Kp209\_CSTR$  NHS, respectively). (e&f) Inner membrane permeabilization of *E. coli* MG1655 (e) and Kp209\_CSTR (f) in the presence of 1% NHS,  $\Delta E. coli$  NHS,  $\Delta Kp209$  NHS, or  $\Delta Kp209\_CSTR$  NHS (f)  $\Delta Kp209\_CSTR$  NHS was supplemented with physiological concentrations of IgM (+IgM; 15  $\mu\text{g}/\text{ml}$  in 1% NHS) isolated from individual serum donors. (g) IgM binding to Kp209 and Kp209\_CSTR in IgM isolated from NHS, or isolated IgM depleted using *E. coli* MG1655, Kp209 or Kp209\_CSTR ( $\Delta E. coli$  IgM,  $\Delta Kp209$  IgM, and  $\Delta Kp209\_CSTR$  IgM, respectively). (h) IgM binding to Kp209 and Kp209\_CSTR with IgM isolated from NHS (dotted), IgM depleted with Kp209 (grey) or Kp209\_CSTR (orange). Slitted line corresponds to the buffer control. Geometric mean fluorescent intensity (gMFI) and number of events normalized to mode are depicted on the X- and Y-axis, respectively. The graph is representative for three independent repeats. (i) IgM binding to *E. coli* MG1655 in IgM isolated from NHS,  $\Delta E. coli$  IgM,  $\Delta Kp209$  IgM, or  $\Delta Kp209\_CSTR$  IgM. (a-d&g-i) IgG binding was performed in 0.3% NHS. IgM binding was performed in 10% (depleted) NHS or 45  $\mu\text{g}/\text{ml}$  (depleted) IgM isolated from NHS. Binding was detected using anti-hu-IgG-AF647 or anti-hu-IgM-FITC by flow cytometry. Flow cytometry data are represented by gMFI values of bacterial populations. Data represent mean  $\pm$  standard deviation of three independent experiments. (e&f) Bacteria were incubated at 37 °C in the presence of 1  $\mu\text{M}$  SYTOX green nucleic acid stain, and inner membrane permeabilization (SYTOX fluorescence intensity) was detected after (e) 60 or (f) 90 minutes. Data represents mean  $\pm$  standard deviation of a minimal of two independent experiments. (a&b) Statistical analysis was performed using a nonlinear regression with a variable slope comparing the logEC50 via sum-of squares F test, (c,d,g&i) a paired one-way ANOVA with a Tukey's multiple comparisons on  $\text{Log}_{10}$ -transformed gMFI data, (e) or a paired one-way ANOVA with a Tukey's multiple comparisons test on SYTOX fluorescence intensity data.

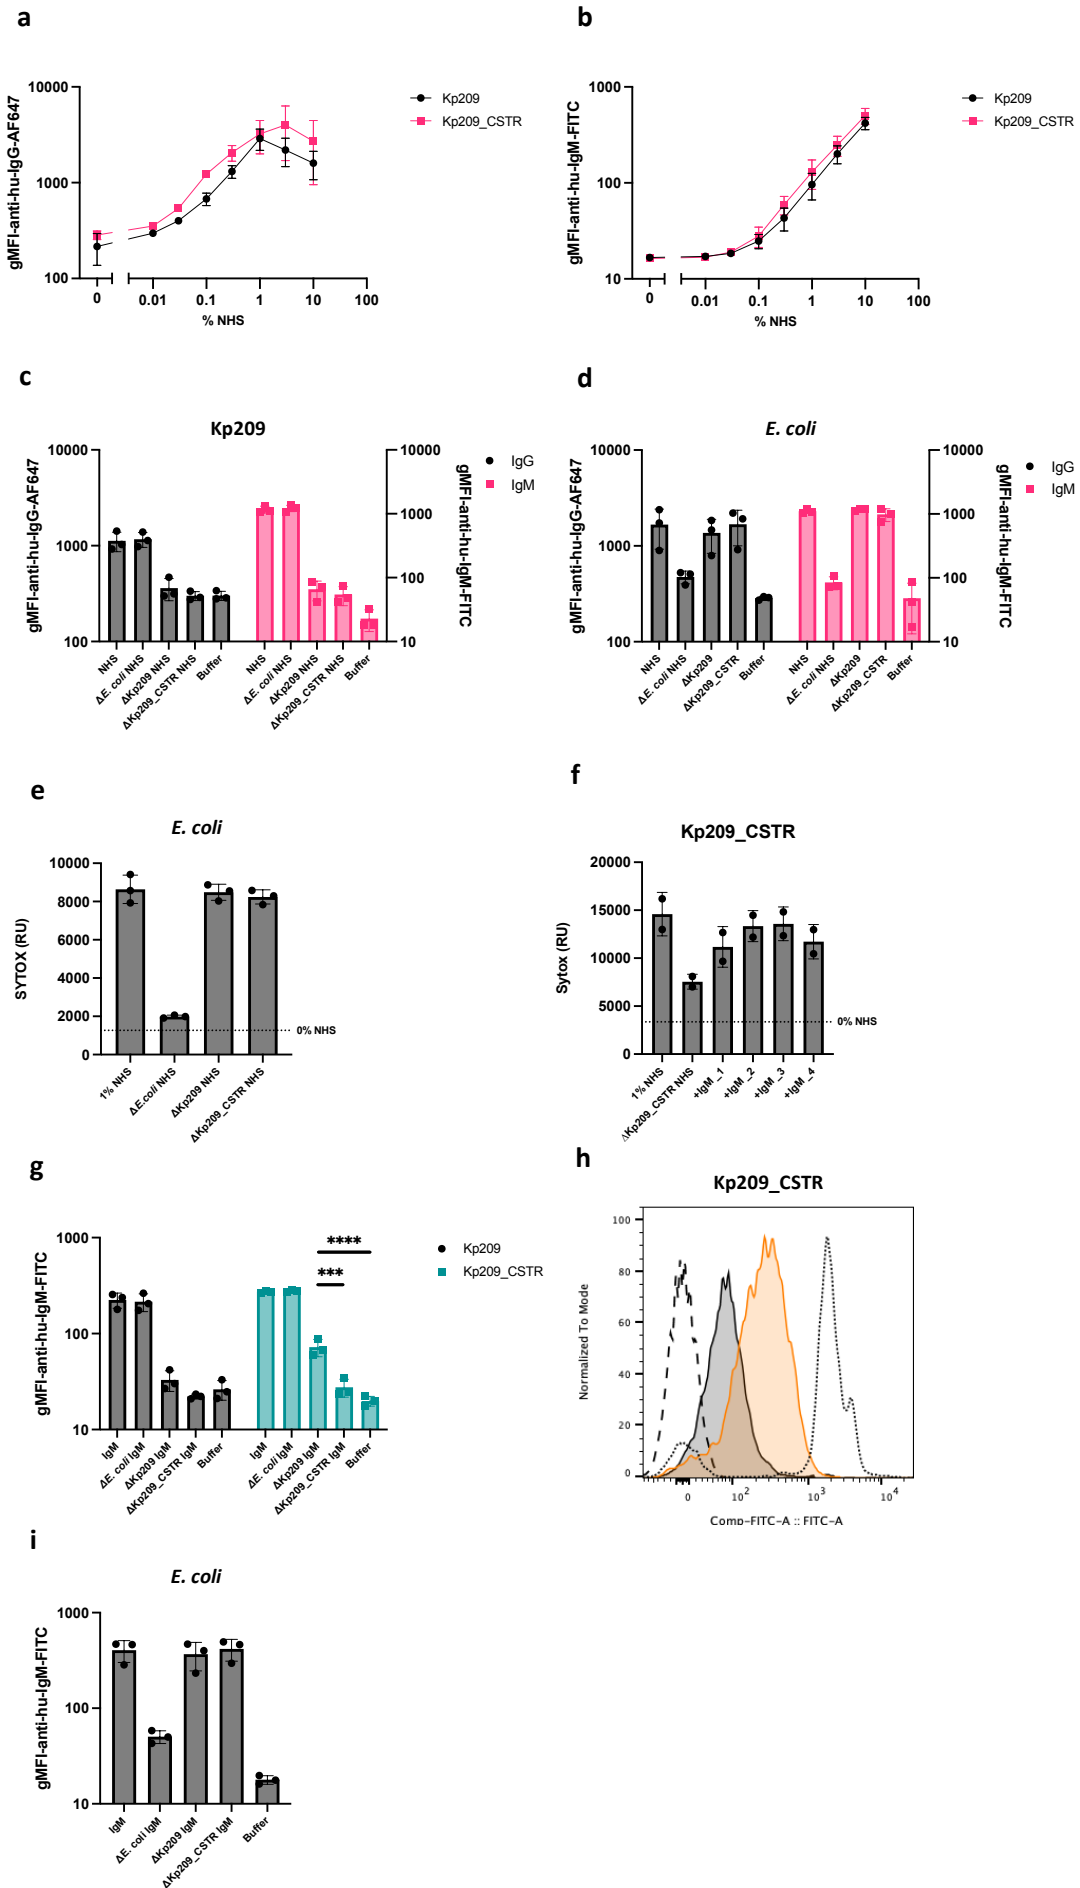

Supplementary table SI1 Differentially expressed genes in Kp209\_CSTR compared to Kp209

| Kpn209S ID                                                                   | Name/prediction | Log <sub>2</sub> (FC) | P <sub>adj</sub> |
|------------------------------------------------------------------------------|-----------------|-----------------------|------------------|
| <b>Upregulated genes (Log<sub>2</sub>(FC)&gt;1, P<sub>adj</sub>&lt;0.05)</b> |                 |                       |                  |
| <i>Kpn209S_01234</i>                                                         | <i>mgtE.1</i>   | 5.25                  | 1.06E-195        |
| <i>Kpn209S_03326</i>                                                         | <i>mgtC</i>     | 4.15                  | 3.81E-90         |
| <i>Kpn209S_03165</i>                                                         | -               | 3.87                  | 3.69E-57         |
| <i>Kpn209S_03486</i>                                                         | <i>iolT</i>     | 3.79                  | 1.12E-45         |
| <i>Kpn209S_01244</i>                                                         | <i>arnC</i>     | 3.51                  | 9.15E-146        |
| <i>Kpn209S_03613</i>                                                         | -               | 3.42                  | 1.46E-40         |
| <i>Kpn209S_01243</i>                                                         | <i>arnB</i>     | 3.42                  | 5.53E-98         |
| <i>Kpn209S_01954</i>                                                         | -               | 3.39                  | 5.43E-42         |
| <i>Kpn209S_01095</i>                                                         | <i>clcB</i>     | 3.38                  | 2.77E-69         |
| <i>Kpn209S_03674</i>                                                         | -               | 3.35                  | 1.09E-39         |
| <i>Kpn209S_03723</i>                                                         | <i>yabl</i>     | 3.28                  | 1.08E-51         |
| <i>Kpn209S_00443</i>                                                         | <i>mgtA</i>     | 3.24                  | 1.48E-51         |
| <i>Kpn209S_01245</i>                                                         | <i>arnA</i>     | 3.22                  | 5.16E-78         |
| <i>Kpn209S_04650</i>                                                         | <i>ctpF</i>     | 3.16                  | 2.08E-61         |
| <i>Kpn209S_02782</i>                                                         | -               | 3.15                  | 2.28E-52         |
| <i>Kpn209S_01246</i>                                                         | <i>arnD</i>     | 3.11                  | 2.67E-90         |
| <i>Kpn209S_04711</i>                                                         | <i>scrB</i>     | 3.04                  | 1.29E-21         |
| <i>Kpn209S_04649</i>                                                         | <i>mdtA</i>     | 3.04                  | 7.99E-46         |
| <i>Kpn209S_04702</i>                                                         | <i>btuF</i>     | 3.03                  | 2.00E-42         |
| <i>Kpn209S_01247</i>                                                         | <i>arnT</i>     | 3.00                  | 8.63E-102        |
| <i>Kpn209S_02647</i>                                                         | <i>pmrD</i>     | 3.00                  | 1.73E-56         |
| <i>Kpn209S_03320</i>                                                         | <i>mamB</i>     | 2.98                  | 1.40E-25         |



|                             |             |      |          |
|-----------------------------|-------------|------|----------|
| <b><i>Kpn209S_04708</i></b> | <i>scrK</i> | 2.91 | 9.08E-19 |
| <b><i>Kpn209S_03612</i></b> | -           | 2.91 | 2.84E-23 |
| <b><i>Kpn209S_01631</i></b> | <i>ribB</i> | 2.91 | 1.21E-49 |
| <b><i>Kpn209S_04552</i></b> | <i>pagP</i> | 2.83 | 3.30E-52 |
| <b><i>Kpn209S_02224</i></b> | -           | 2.81 | 9.56E-50 |
| <b><i>Kpn209S_04703</i></b> | <i>hmuU</i> | 2.76 | 1.72E-35 |
| <b><i>Kpn209S_00310</i></b> | -           | 2.75 | 1.24E-28 |
| <b><i>Kpn209S_02223</i></b> | -           | 2.72 | 2.16E-52 |
| <b><i>Kpn209S_02797</i></b> | -           | 2.66 | 2.38E-45 |
| <b><i>Kpn209S_03487</i></b> | <i>fruB</i> | 2.62 | 1.69E-11 |
| <b><i>Kpn209S_01249</i></b> | <i>arnF</i> | 2.60 | 2.38E-43 |
| <b><i>Kpn209S_04337</i></b> | <i>ybjG</i> | 2.56 | 1.08E-51 |
| <b><i>Kpn209S_04704</i></b> | <i>fhuC</i> | 2.53 | 5.59E-30 |
| <b><i>Kpn209S_03568</i></b> | -           | 2.50 | 1.38E-15 |
| <b><i>Kpn209S_02225</i></b> | -           | 2.48 | 2.67E-29 |
| <b><i>Kpn209S_04648</i></b> | <i>bepG</i> | 2.42 | 3.12E-32 |
| <b><i>Kpn209S_04492</i></b> | <i>kdpA</i> | 2.38 | 8.00E-22 |
| <b><i>Kpn209S_02460</i></b> | <i>apbE</i> | 2.36 | 4.22E-44 |
| <b><i>Kpn209S_04416</i></b> | <i>bioB</i> | 2.34 | 4.79E-28 |
| <b><i>Kpn209S_04298</i></b> | <i>macA</i> | 2.34 | 1.63E-55 |
| <b><i>Kpn209S_04087</i></b> | <i>phoP</i> | 2.34 | 1.41E-29 |
| <b><i>Kpn209S_05121</i></b> | -           | 2.34 | 1.16E-22 |
| <b><i>Kpn209S_02783</i></b> | -           | 2.34 | 1.54E-13 |
| <b><i>Kpn209S_03672</i></b> | <i>zntB</i> | 2.32 | 1.10E-19 |
| <b><i>Kpn209S_02461</i></b> | <i>ada</i>  | 2.27 | 1.97E-46 |

|                             |             |      |          |
|-----------------------------|-------------|------|----------|
| <b><i>Kpn209S_01787</i></b> | <i>fimA</i> | 2.27 | 6.99E-06 |
| <b><i>Kpn209S_01248</i></b> | <i>arnE</i> | 2.27 | 9.90E-21 |
| <b><i>Kpn209S_03301</i></b> | <i>maeA</i> | 2.22 | 1.23E-42 |
| <b><i>Kpn209S_03166</i></b> | <i>slyB</i> | 2.17 | 2.38E-19 |
| <b><i>Kpn209S_01782</i></b> | <i>fimH</i> | 2.15 | 2.94E-05 |
| <b><i>Kpn209S_04297</i></b> | <i>macB</i> | 2.12 | 5.55E-33 |
| <b><i>Kpn209S_04415</i></b> | <i>bioF</i> | 2.11 | 1.50E-17 |
| <b><i>Kpn209S_00268</i></b> | <i>mdoB</i> | 2.11 | 1.69E-32 |
| <b><i>Kpn209S_04710</i></b> | <i>sacX</i> | 2.10 | 3.80E-05 |
| <b><i>Kpn209S_02462</i></b> | <i>alkB</i> | 2.06 | 9.26E-22 |
| <b><i>Kpn209S_03599</i></b> | <i>speG</i> | 2.06 | 2.33E-35 |
| <b><i>Kpn209S_00627</i></b> | <i>nhaK</i> | 2.05 | 5.59E-43 |
| <b><i>Kpn209S_01786</i></b> | <i>fimC</i> | 2.05 | 8.39E-05 |
| <b><i>Kpn209S_04088</i></b> | <i>phoQ</i> | 2.04 | 2.00E-24 |
| <b><i>Kpn209S_01785</i></b> | <i>fimD</i> | 2.03 | 9.59E-05 |
| <b><i>Kpn209S_04814</i></b> | <i>yheI</i> | 1.98 | 9.73E-24 |
| <b><i>Kpn209S_04414</i></b> | <i>bioC</i> | 1.98 | 9.80E-15 |
| <b><i>Kpn209S_01784</i></b> | <i>fimF</i> | 1.96 | 1.91E-04 |
| <b><i>Kpn209S_01788</i></b> | <i>fim</i>  | 1.96 | 1.97E-04 |
| <b><i>Kpn209S_04709</i></b> | <i>scrY</i> | 1.95 | 2.35E-04 |
| <b><i>Kpn209S_03142</i></b> | <i>mdtK</i> | 1.93 | 3.93E-16 |
| <b><i>Kpn209S_02206</i></b> | <i>pgpC</i> | 1.89 | 4.07E-19 |
| <b><i>Kpn209S_04101</i></b> | <i>dmdB</i> | 1.88 | 2.68E-16 |
| <b><i>Kpn209S_04100</i></b> | <i>betB</i> | 1.87 | 8.48E-13 |
| <b><i>Kpn209S_01783</i></b> | <i>fimG</i> | 1.86 | 5.10E-04 |

|                             |             |      |          |
|-----------------------------|-------------|------|----------|
| <b><i>Kpn209S_03183</i></b> | <i>ydgT</i> | 1.86 | 2.63E-17 |
| <b><i>Kpn209S_03598</i></b> | -           | 1.85 | 5.05E-17 |
| <b><i>Kpn209S_00017</i></b> | <i>yaeQ</i> | 1.79 | 3.31E-27 |
| <b><i>Kpn209S_01781</i></b> | -           | 1.74 | 1.55E-03 |
| <b><i>Kpn209S_02799</i></b> | <i>ftsl</i> | 1.72 | 5.67E-09 |
| <b><i>Kpn209S_04413</i></b> | <i>bioD</i> | 1.69 | 2.68E-08 |
| <b><i>Kpn209S_04493</i></b> | <i>kdpB</i> | 1.66 | 1.54E-10 |
| <b><i>Kpn209S_03300</i></b> | -           | 1.61 | 5.59E-06 |
| <b><i>Kpn209S_04249</i></b> | <i>dpaL</i> | 1.60 | 7.22E-04 |
| <b><i>Kpn209S_03185</i></b> | <i>ydgJ</i> | 1.60 | 8.07E-16 |
| <b><i>Kpn209S_03327</i></b> | <i>zapE</i> | 1.58 | 1.39E-14 |
| <b><i>Kpn209S_00693</i></b> | -           | 1.56 | 5.13E-17 |
| <b><i>Kpn209S_04813</i></b> | <i>mdlB</i> | 1.56 | 5.91E-14 |
| <b><i>Kpn209S_01938</i></b> | <i>ppnN</i> | 1.54 | 9.77E-13 |
| <b><i>Kpn209S_04677</i></b> |             | 1.52 | 9.18E-05 |
| <b><i>Kpn209S_04467</i></b> | <i>ybgC</i> | 1.50 | 3.59E-12 |
| <b><i>Kpn209S_03728</i></b> | <i>ompN</i> | 1.49 | 9.90E-05 |
| <b><i>Kpn209S_04757</i></b> | <i>fetA</i> | 1.49 | 3.69E-15 |
| <b><i>Kpn209S_01476</i></b> | <i>miaF</i> | 1.48 | 1.74E-16 |
| <b><i>Kpn209S_03182</i></b> | <i>ydgK</i> | 1.47 | 1.84E-08 |
| <b><i>Kpn209S_03933</i></b> | <i>pfeA</i> | 1.44 | 6.22E-09 |
| <b><i>Kpn209S_01523</i></b> | <i>osmY</i> | 1.41 | 1.08E-17 |
| <b><i>Kpn209S_01538</i></b> | <i>gatY</i> | 1.40 | 8.90E-03 |
| <b><i>Kpn209S_04466</i></b> | <i>tolQ</i> | 1.38 | 6.13E-11 |
| <b><i>Kpn209S_01477</i></b> | <i>miaE</i> | 1.36 | 3.59E-16 |

|                             |             |      |          |
|-----------------------------|-------------|------|----------|
| <b><i>Kpn209S_03932</i></b> | <i>yciB</i> | 1.33 | 8.40E-10 |
| <b><i>Kpn209S_01121</i></b> | -           | 1.33 | 2.00E-07 |
| <b><i>Kpn209S_04756</i></b> | <i>fetB</i> | 1.32 | 1.22E-12 |
| <b><i>Kpn209S_01524</i></b> | <i>diaA</i> | 1.31 | 9.16E-15 |
| <b><i>Kpn209S_02488</i></b> | <i>lpxT</i> | 1.31 | 9.59E-05 |
| <b><i>Kpn209S_00015</i></b> | <i>nlpE</i> | 1.30 | 6.10E-15 |
| <b><i>Kpn209S_01790</i></b> | -           | 1.29 | 6.40E-09 |
| <b><i>Kpn209S_04812</i></b> | <i>glnK</i> | 1.25 | 2.66E-03 |
| <b><i>Kpn209S_00337</i></b> | -           | 1.25 | 1.87E-08 |
| <b><i>Kpn209S_01636</i></b> | <i>tolC</i> | 1.25 | 7.20E-11 |
| <b><i>Kpn209S_04729</i></b> | <i>lpxL</i> | 1.24 | 6.57E-09 |
| <b><i>Kpn209S_01478</i></b> | <i>miaD</i> | 1.24 | 6.74E-14 |
| <b><i>Kpn209S_04846</i></b> | <i>yajR</i> | 1.22 | 1.74E-07 |
| <b><i>Kpn209S_04464</i></b> | -           | 1.20 | 4.50E-08 |
| <b><i>Kpn209S_02092</i></b> | -           | 1.20 | 1.52E-05 |
| <b><i>Kpn209S_01480</i></b> | <i>miaB</i> | 1.19 | 3.77E-13 |
| <b><i>Kpn209S_04338</i></b> | <i>deoR</i> | 1.19 | 1.50E-08 |
| <b><i>Kpn209S_04465</i></b> | <i>tolR</i> | 1.18 | 5.96E-08 |
| <b><i>Kpn209S_00016</i></b> | <i>arfB</i> | 1.18 | 6.49E-13 |
| <b><i>Kpn209S_03847</i></b> | -           | 1.17 | 1.63E-02 |
| <b><i>Kpn209S_04469</i></b> | <i>cydX</i> | 1.12 | 1.16E-02 |
| <b><i>Kpn209S_00761</i></b> | <i>tatA</i> | 1.11 | 8.31E-11 |
| <b><i>Kpn209S_03299</i></b> | -           | 1.11 | 4.30E-02 |
| <b><i>Kpn209S_05125</i></b> | <i>umuC</i> | 1.11 | 1.37E-03 |
| <b><i>Kpn209S_01479</i></b> | <i>miaC</i> | 1.11 | 2.31E-12 |

|                                                                                 |             |       |          |
|---------------------------------------------------------------------------------|-------------|-------|----------|
| <b><i>Kpn209S_04468</i></b>                                                     | -           | 1.08  | 7.62E-05 |
| <b><i>Kpn209S_04470</i></b>                                                     | <i>cydB</i> | 1.05  | 1.10E-07 |
| <b><i>Kpn209S_01122</i></b>                                                     | -           | 1.04  | 1.31E-05 |
| <b><i>Kpn209S_00758</i></b>                                                     | <i>tatD</i> | 1.04  | 4.59E-08 |
| <b><i>Kpn209S_04712</i></b>                                                     | <i>cra_</i> | 1.03  | 1.59E-07 |
| <b>Down regulated genes Log<sub>2</sub>(FC)&lt;-1, P<sub>adj</sub>&lt;0.05)</b> |             |       |          |
| <b><i>Kpn209S_04410</i></b>                                                     | -           | -3.28 | 2.33E-35 |
| <b><i>Kpn209S_04407</i></b>                                                     | <i>eptA</i> | -2.78 | 2.52E-23 |
| <b><i>Kpn209S_02806</i></b>                                                     | <i>yoaE</i> | -2.60 | 7.03E-34 |
| <b><i>Kpn209S_00354</i></b>                                                     | -           | -2.47 | 7.68E-24 |
| <b><i>Kpn209S_00355</i></b>                                                     | -           | -2.26 | 1.78E-21 |
| <b><i>Kpn209S_04408</i></b>                                                     | <i>pmrA</i> | -2.16 | 3.29E-16 |
| <b><i>Kpn209S_00356</i></b>                                                     | -           | -1.97 | 4.50E-08 |
| <b><i>Kpn209S_02517</i></b>                                                     | <i>oprB</i> | -1.81 | 1.16E-06 |
| <b><i>Kpn209S_04409</i></b>                                                     | <i>pmrB</i> | -1.80 | 7.02E-12 |
| <b><i>Kpn209S_04419</i></b>                                                     | <i>proY</i> | -1.72 | 1.04E-05 |
| <b><i>Kpn209S_04252</i></b>                                                     | <i>yedS</i> | -1.70 | 1.25E-19 |
| <b><i>Kpn209S_04420</i></b>                                                     | <i>hutH</i> | -1.69 | 8.22E-05 |
| <b><i>Kpn209S_03684</i></b>                                                     | <i>cycA</i> | -1.67 | 2.39E-05 |
| <b><i>Kpn209S_00357</i></b>                                                     | -           | -1.66 | 1.30E-06 |
| <b><i>Kpn209S_04421</i></b>                                                     | <i>hutU</i> | -1.64 | 2.94E-05 |
| <b><i>Kpn209S_02966</i></b>                                                     | <i>rutC</i> | -1.60 | 7.18E-04 |
| <b><i>Kpn209S_02520</i></b>                                                     | <i>bglB</i> | -1.59 | 4.59E-08 |
| <b><i>Kpn209S_01312</i></b>                                                     | <i>feoA</i> | -1.57 | 8.04E-05 |
| <b><i>Kpn209S_02514</i></b>                                                     | <i>yohK</i> | -1.57 | 6.19E-05 |

|                             |             |       |          |
|-----------------------------|-------------|-------|----------|
| <b><i>Kpn209S_00358</i></b> | <i>ufaA</i> | -1.56 | 9.23E-07 |
| <b><i>Kpn209S_03046</i></b> | -           | -1.46 | 3.37E-03 |
| <b><i>Kpn209S_02515</i></b> | -           | -1.44 | 5.42E-06 |
| <b><i>Kpn209S_03019</i></b> | -           | -1.42 | 2.42E-03 |
| <b><i>Kpn209S_03686</i></b> | <i>astB</i> | -1.40 | 1.28E-03 |
| <b><i>Kpn209S_03685</i></b> | <i>astE</i> | -1.38 | 4.42E-03 |
| <b><i>Kpn209S_02519</i></b> | <i>bglF</i> | -1.34 | 2.49E-08 |
| <b><i>Kpn209S_01311</i></b> | <i>feoB</i> | -1.33 | 2.72E-03 |
| <b><i>Kpn209S_02189</i></b> | <i>grcA</i> | -1.32 | 4.25E-03 |
| <b><i>Kpn209S_02830</i></b> | <i>dadX</i> | -1.32 | 5.04E-05 |
| <b><i>Kpn209S_00849</i></b> | <i>zinT</i> | -1.30 | 2.80E-06 |
| <b><i>Kpn209S_03595</i></b> | <i>por</i>  | -1.30 | 7.66E-03 |
| <b><i>Kpn209S_04342</i></b> | -           | -1.28 | 1.74E-02 |
| <b><i>Kpn209S_03687</i></b> | <i>astD</i> | -1.28 | 7.21E-03 |
| <b><i>Kpn209S_03635</i></b> | <i>ttdT</i> | -1.27 | 2.02E-03 |
| <b><i>Kpn209S_01194</i></b> | -           | -1.27 | 1.74E-07 |
| <b><i>Kpn209S_00616</i></b> | <i>acs</i>  | -1.25 | 7.97E-04 |
| <b><i>Kpn209S_02967</i></b> | <i>dadA</i> | -1.24 | 9.09E-03 |
| <b><i>Kpn209S_02984</i></b> | -           | -1.18 | 7.67E-03 |
| <b><i>Kpn209S_00254</i></b> | -           | -1.18 | 1.80E-02 |
| <b><i>Kpn209S_01240</i></b> | <i>nikA</i> | -1.16 | 7.75E-04 |
| <b><i>Kpn209S_00625</i></b> | <i>cidA</i> | -1.16 | 9.95E-04 |
| <b><i>Kpn209S_02511</i></b> | <i>mgIC</i> | -1.14 | 8.95E-03 |
| <b><i>Kpn209S_02084</i></b> | <i>nrdH</i> | -1.13 | 9.03E-03 |
| <b><i>Kpn209S_03634</i></b> | <i>namA</i> | -1.11 | 2.34E-03 |

|                             |             |       |          |
|-----------------------------|-------------|-------|----------|
| <b><i>Kpn209S_05120</i></b> | <i>scrK</i> | -1.10 | 4.96E-04 |
| <b><i>Kpn209S_04178</i></b> | <i>putA</i> | -1.10 | 5.78E-04 |
| <b><i>Kpn209S_02491</i></b> | <i>uxuA</i> | -1.09 | 5.87E-04 |
| <b><i>Kpn209S_02422</i></b> | <i>nuoG</i> | -1.08 | 5.10E-07 |
| <b><i>Kpn209S_02421</i></b> | <i>nuoF</i> | -1.08 | 5.66E-05 |
| <b><i>Kpn209S_05135</i></b> | -           | -1.08 | 9.26E-06 |
| <b><i>Kpn209S_01195</i></b> | <i>bcsQ</i> | -1.07 | 4.63E-04 |
| <b><i>Kpn209S_00362</i></b> | -           | -1.07 | 1.05E-02 |
| <b><i>Kpn209S_05141</i></b> | -           | -1.06 | 5.51E-03 |
| <b><i>Kpn209S_01175</i></b> | <i>kdgK</i> | -1.06 | 3.85E-02 |
| <b><i>Kpn209S_04476</i></b> | <i>sdhB</i> | -1.06 | 7.56E-03 |
| <b><i>Kpn209S_03607</i></b> | <i>bioD</i> | -1.05 | 9.26E-03 |
| <b><i>Kpn209S_02450</i></b> | <i>glpQ</i> | -1.05 | 1.37E-04 |
| <b><i>Kpn209S_04789</i></b> | <i>ykgO</i> | -1.05 | 6.90E-03 |
| <b><i>Kpn209S_03594</i></b> | <i>uspG</i> | -1.01 | 2.78E-02 |
| <b><i>Kpn209S_02049</i></b> | <i>srIE</i> | -1.01 | 1.79E-02 |

**Supplementary table SI2. Real-time PCR primers**

| Primer | Sequence (5'→ 3')     | T <sub>M</sub> (°C) | Amplicon size (bp) | Reference  |
|--------|-----------------------|---------------------|--------------------|------------|
| arnD-F | AACTACTGACCATGGCGGCG  | 61.5                | 116                | 12*        |
| arnD-R | GCCAGCCAGTTCACCACGAA  | 62.5                |                    | 12*        |
| mgtE-F | TGGTGTGCATTACCCTGTG   | 57.0                | 100                | This study |
| mgtE-R | ATAAACGGCGCGGAAACTA   | 56.3                |                    | This study |
| rpoB-F | GATCCGTGGCGTGACTTATT  | 55.0                | 118                | 54         |
| rpoB-R | GCCCATGTAGACTTCTTGTCT | 54.6                |                    | 54         |

\*Reference 12 used the alternative gene name *pgbP* for *arnD*
